# Supplementary material for: Enhancing Cu–ligand interaction for efficient CO2 reduction towards multi-carbon products
Source: Royal Society of Chemistry journal article supplement (doi:10.1039/d3cc05972c), 2024-01-01
Supplement: d3cc05972c1.pdf [file d3cc05972c1.pdf]

## Electronic Supplementary Information

### Enhancing Cu-Ligand Interaction for Efficient CO<sub>2</sub> Reduction towards Multi-carbon Products

Jingyi Chen<sup>+[a]</sup>, Lei Fan<sup>+[a]</sup>, Yilin Zhao<sup>[a]</sup>, Haozhou Yang<sup>[a]</sup>, Di Wang<sup>[a]</sup>, Bihao Hu<sup>[a]</sup>, Shibo Xi<sup>[b]</sup>, and Lei Wang<sup>\*[a,c]</sup>

[a] Department of Chemical and Biomolecular Engineering, National University of Singapore, 4 Engineering Drive 4, Singapore 117585

[b] Institute of Sustainability for Chemicals, Energy and Environment, A\*STAR, 1 Pesek Road, Jurong Island, Singapore 627833

[c] Centre for Hydrogen Innovations, National University of Singapore, 4 Engineering Drive 4, Singapore 117585

<sup>+</sup> These authors contributed equally to this work.

E-mail: [wanglei8@nus.edu.sg](mailto:wanglei8@nus.edu.sg)

## Table of content

|                                                                                                                                                                                                                                                                                                                                                                                                   |    |
|---------------------------------------------------------------------------------------------------------------------------------------------------------------------------------------------------------------------------------------------------------------------------------------------------------------------------------------------------------------------------------------------------|----|
| Experimental Procedures.....                                                                                                                                                                                                                                                                                                                                                                      | 3  |
| Figure S1 CO <sub>2</sub> reduction performance of the physical mixture of DAT and CuNPs with molar ratio from 0 to 4 (a-e).....                                                                                                                                                                                                                                                                  | 6  |
| Figure S2 EDS mapping of post-reaction mixture between CuNPs and DAT ligand. ....                                                                                                                                                                                                                                                                                                                 | 7  |
| Figure S3 SEM image for post-reaction sample of CuNPs and DAT ligand mixture. Parts of Cu particles are exposed in the absence of ligand modification. ....                                                                                                                                                                                                                                       | 8  |
| Figure S4 XRD of as-prepared CuDAT. ....                                                                                                                                                                                                                                                                                                                                                          | 9  |
| Figure S5 Cu 2p XPS of as-prepared CuDAT sample. ....                                                                                                                                                                                                                                                                                                                                             | 10 |
| Figure S6 ATR-FTIR spectrum of as-prepared CuDAT.....                                                                                                                                                                                                                                                                                                                                             | 11 |
| Figure S7 FE(C <sub>2+</sub> ) comparison of CuDAT and CuNPs at different current density. ....                                                                                                                                                                                                                                                                                                   | 12 |
| Figure S8 The cyclic voltammetry curve of (a) CuDAT, (b) CuNPs in Ar-saturated 1M KHCO <sub>3</sub> . (c)The fitted electrical double layer capacitance of CuDAT and CuNPs.....                                                                                                                                                                                                                   | 13 |
| Figure S9 ECSA normalized current density of CuDAT and CuNPs.....                                                                                                                                                                                                                                                                                                                                 | 14 |
| Figure S10 CO <sub>2</sub> R stability test on CuDAT at 200 mA cm <sup>-2</sup> .....                                                                                                                                                                                                                                                                                                             | 15 |
| Figure S11 (a) SEM and (b) TEM images of post-reaction CuDAT. (c) SEM images of as-prepared CuDAT. ....                                                                                                                                                                                                                                                                                           | 16 |
| Figure S12 (a) TEM image and (b, c) HRTEM images of post-reaction CuDAT samples. Zero-valance Cu aggregation happens with the particle size ~5 nm.....                                                                                                                                                                                                                                            | 17 |
| Figure S13 XRD of post-reaction CuDAT, commercial CuNPs and carbon paper substrate. ....                                                                                                                                                                                                                                                                                                          | 18 |
| Figure S14 XRD of as-prepared and post-reaction CuDAT. ....                                                                                                                                                                                                                                                                                                                                       | 19 |
| Figure S15 Cross-section EDS mapping of post-reaction CuDAT.....                                                                                                                                                                                                                                                                                                                                  | 20 |
| Figure S16 ATR-FTIR spectra of post-reaction CuDAT.....                                                                                                                                                                                                                                                                                                                                           | 21 |
| Figure S17 <i>In situ</i> -ATR-SEIRAS spectra of commercial CuNPs.....                                                                                                                                                                                                                                                                                                                            | 22 |
| Fig. S18 CO stripping on CuDAT and CuNPs with the scan rate of 10 mV S <sup>-1</sup> , after 10s CO adsorption at -0.3 V in CO saturated 0.1 M KOH. ....                                                                                                                                                                                                                                          | 23 |
| Figure S19 (a) In-situ ATR-SEIRAS of physical mixture of commercial CuNPs and DAT ligand during CO <sub>2</sub> R (the mass ratio of DAT to CuNPs = 2). (b) Relative absorbance of *CO <sub>L</sub> band for CuNPs, and physical mixture of CuNPs and DAT ligand. (c) *CO <sub>L</sub> band in in-situ ATR-SEIRAS of CuNPs, and physical mixture of CuNPs and DAT ligand, at -0.7 V vs. RHE. .... | 24 |

|                                                                                                                                                |    |
|------------------------------------------------------------------------------------------------------------------------------------------------|----|
| Figure S20 Low-concentration CO <sub>2</sub> reduction performance of CuNPs in 1 M KHCO <sub>3</sub> at 300 mA cm <sup>-2</sup> . .....        | 25 |
| Figure S21 Overpotential of CuDAT and CuNPs to achieve 300 mA cm <sup>-2</sup> at different CO <sub>2</sub> partial pressure. ....             | 26 |
| Figure S22 FE(C <sub>2+</sub> )/FE(CO <sub>2</sub> R) for CuDAT and CuNPs with different p(CO <sub>2</sub> ) at 300 mA cm <sup>-2</sup> . .... | 27 |
| Reference.....                                                                                                                                 | 28 |

## Experimental Procedures

**Chemicals and materials:** Copper(II) sulfate (CuSO<sub>4</sub>, 99%), 3,5-Diamino-1,2,4-triazole (C<sub>2</sub>H<sub>5</sub>N<sub>5</sub>, 98%), 3-Amino-1,2,4-triazole (C<sub>2</sub>H<sub>4</sub>N<sub>4</sub>, 95%), 1,2,4-Triazole (C<sub>2</sub>H<sub>3</sub>N<sub>3</sub>, 98%), Copper nanopowder (60-80 nm, 99.5%), Potassium bicarbonate (KHCO<sub>3</sub>, 99.999%) were purchased from Sigma-Aldrich. All reagents were used as received without further purification.

**Material characterizations:** Transmission electron microscopy (TEM) and corresponding energy-dispersive X-ray spectroscopy (EDS) were taken by a JEOL JEM-2010F TEM. Scanning electron microscope (SEM) and corresponding energy-dispersive X-ray spectroscopy (EDS) were carried by JEOL JSM-7610F SEM. X-ray photoelectron spectroscopy (XPS) was conducted on Kratos Axis UltraDL (Mono Al K $\alpha$ , hv= 1486.71 eV). Fourier-transform infrared spectroscopy (FTIR) was recorded using VERTEX 70 FT-IR Spectrometer. In-situ FTIR was measured by Shimadzu IR tracer-100 FTIR Spectrophotometer. XAS was performed at XAFCA beamline of Singapore Synchrotron Light Source under transmission mode. Cu K-edge XANES and EXAFS spectra were collected. And data process was processed by Athena.

**Synthesis of Cu(II) complexes:** For CuDAT, 2 mmol Cu(SO<sub>4</sub>)·5H<sub>2</sub>O is dissolved in 10 mL deionized water. Then, 10 mL water solution of 3,5-Diamino-1,2,4-triazole (4 mmol) is dropped Cu(SO<sub>4</sub>)·5H<sub>2</sub>O solution under vigorous stirring. After stirring for 4 hours, the products were collected *via* centrifuge at 5000 rpm for 5 minutes and washed three times with deionized water. The resulting samples were dried in vacuum at room temperature overnight. For CuAT and CuT synthesizing, 3-Amino-1,2,4-triazole (C<sub>2</sub>H<sub>4</sub>N<sub>4</sub>, 95%) and 1,2,4-Triazole were applied as the ligand, following the same procedure as CuDAT synthesis.

**CO<sub>2</sub>R measurements in the flow cell:** 4 mg samples (CuDAT, CuAT, CuT and CuNPs) were dispersed in the mixed solution containing 400  $\mu$ L ethanol and 16  $\mu$ L 5 wt% Nafion. The ink was sonicated for 30 min and sprayed on carbon paper (1.2\*1.2 cm<sup>2</sup>, Fuel Cell Gas Diffusion Layer YLS30T) to reach the loading of 1 mg cm<sup>-2</sup>. The reaction was conducted in a self-designed flow cell with a catalyst area of 1 cm<sup>2</sup>. The prepared carbon paper was used as the working electrode, while Ag/AgCl electrode and Pt foil were used as the reference electrode and counter electrode, respectively. All the recorded potentials were converted to RHE scale based on:

$$E \text{ (vs. RHE)} = E \text{ (vs. Ag/AgCl)} + 0.197 \text{ V} + 0.0591 \text{ V} \times \text{pH} - I \times R_s$$

Anion exchange membrane (Selemion AMN/N type 1, AGG Inc.) was applied to separate two compartments. Bio-Logic VMP3 multichannel potentiostat was used for controlling electrochemical measurement. During CO<sub>2</sub> reduction, CO<sub>2</sub> was flowed continuously through the gas chamber at a rate of 20 sccm. The catholyte (1 M KHCO<sub>3</sub>) and anolyte (1 M KOH) flowed at a rate of 10 mL/min under the control of a peristaltic pump. The gas products were analyzed by gas chromatography (GC, Shimadzu 2014). Liquid products were analyzed by <sup>1</sup>H NMR spectrum (Bruker, 400 MHz). Faradic efficiency (FE) for each product was calculated based on:

$$FE = \frac{\text{Product amount (mol)} \times n \times F \text{ (C/mol)}}{I \text{ (A)} \times t \text{ (s)}}$$

where n is the electron transfer number of a specific product, F is the Faradic efficiency (96485 C/mol), I is the total current, and t is reaction time.

**Electrochemical surface area measurement:** The ECSA test was performed in a standard three-electrode system with CuDAT/CuNPs loaded carbon paper as the working electrode, Ag/AgCl as the reference electrode, and platinum foil as the counter electrode. CV tests at different scan rate (20, 40, 60, 80, 100, 120, 140, 160 mV/s) were carried in Ar-saturated 0.1 M KHCO<sub>3</sub>. The normalized current density was calculated based on:

$$\text{ECSA normalized } j = \frac{I}{S_{\text{ECSA}}}$$

$$S_{\text{ECSA}} = \frac{C_{\text{dl}}}{C_s}$$

where  $I$  is current (mA),  $C_{dl}$  is measured double layer capacitance of catalysts, and  $C_s$  is  $C_{dl}$  for planar polycrystalline Cu ( $= 29 \mu\text{F}$ ).<sup>1</sup>

**In-situ ATR-SEIRAS:** The working electrode was prepared on Au film that was pre-deposited onto a silicon attenuated total reflection (ATR) crystal via chemical deposition. 5 mg catalyst (CuDAT or CuNPs) was dispersed in 500  $\mu\text{L}$  ethanol and 20  $\mu\text{L}$  5 wt% Nafion solution to form a homogeneous ink by sonicating. Then, the ink was dropped onto the Au film. The prepared working electrode was assembled into an H cell. Ag/AgCl electrode and graphite rod served as reference and counter electrodes, respectively. Anion exchange membrane (Selemion AMN/N type 1, AGG Inc.) was applied to separate two compartments, 0.2 M  $\text{KHCO}_3$  was used as both catholyte and anolyte with continuous  $\text{CO}_2$  purging, and CHI760e potentiostat was employed to control overpotential. The H cell was assembled Shimadzu IR tracer-100 FTIR Spectrophotometer. Before data collecting, the background was recorded at open circuit potential. During the experiment, the overpotential changed from  $-0.4 \text{ V vs. RHE}$  to  $-1.4 \text{ V vs. RHE}$ . All data was presented in absorbance units.

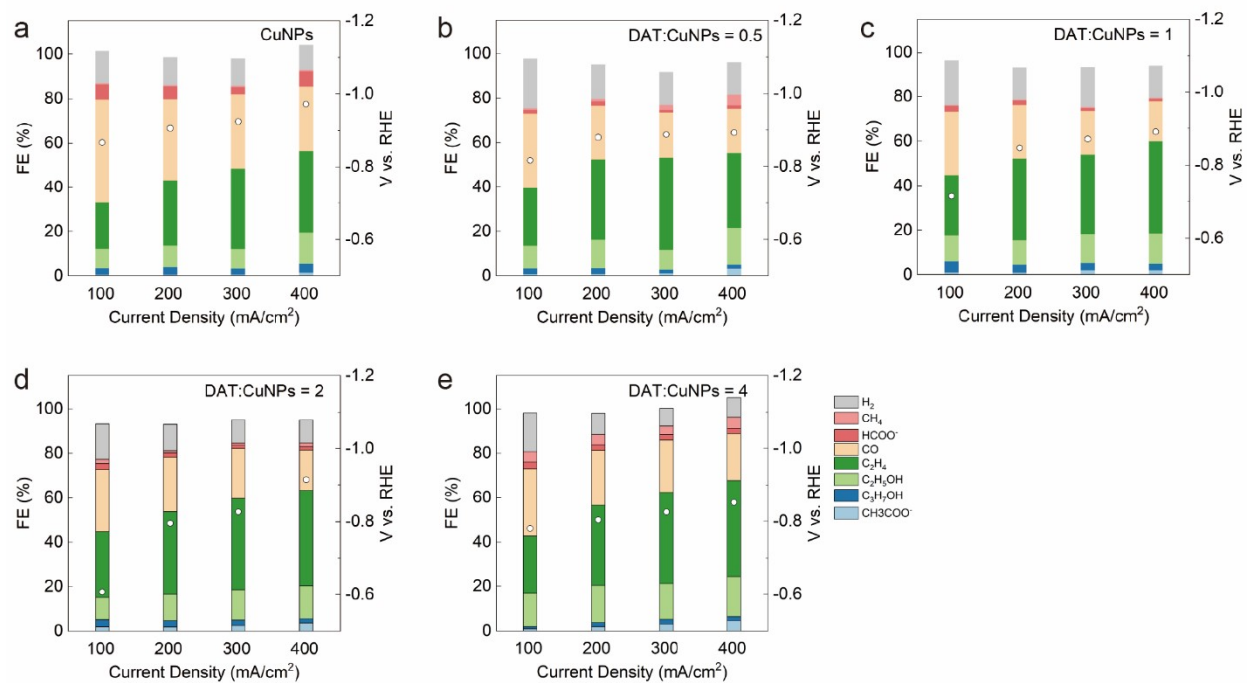

**Figure S1** CO<sub>2</sub> reduction performance of the physical mixture of DAT and CuNPs with molar ratio from 0 to 4 (a-e).

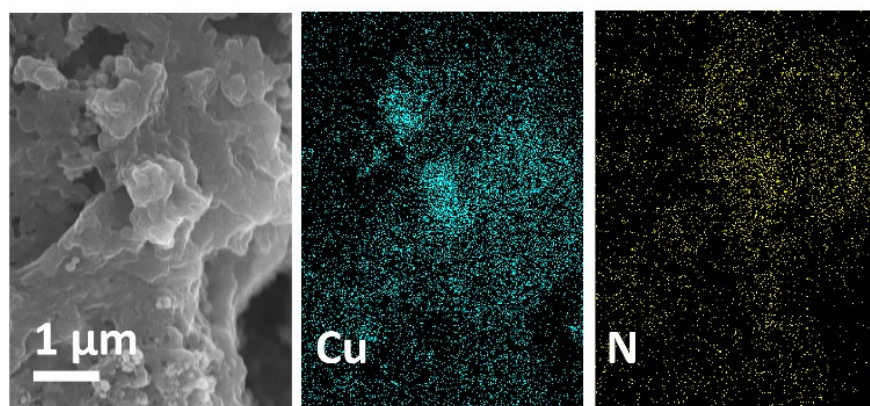

**Figure S2** EDS mapping of post-reaction mixture between CuNPs and DAT ligand.

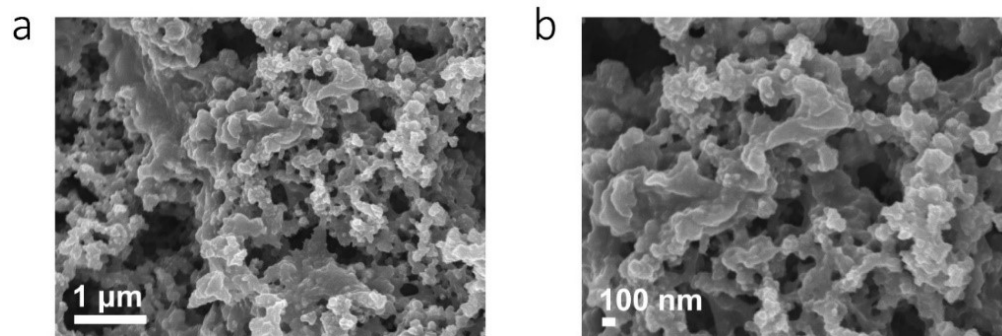

**Figure S3** SEM image for post-reaction sample of CuNPs and DAT ligand mixture. Parts of Cu particles are exposed in the absence of ligand modification.



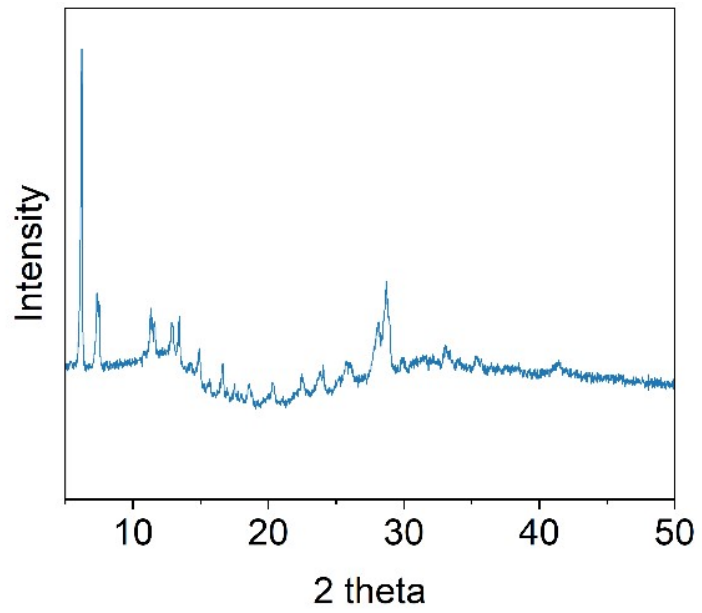

**Figure S4** XRD of as-prepared CuDAT.

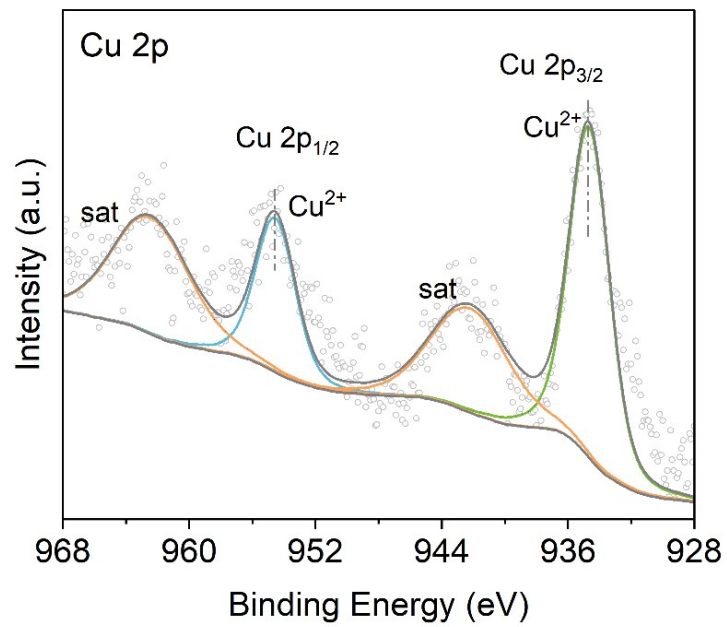

**Figure S5** Cu 2*p* XPS of as-prepared CuDAT sample.

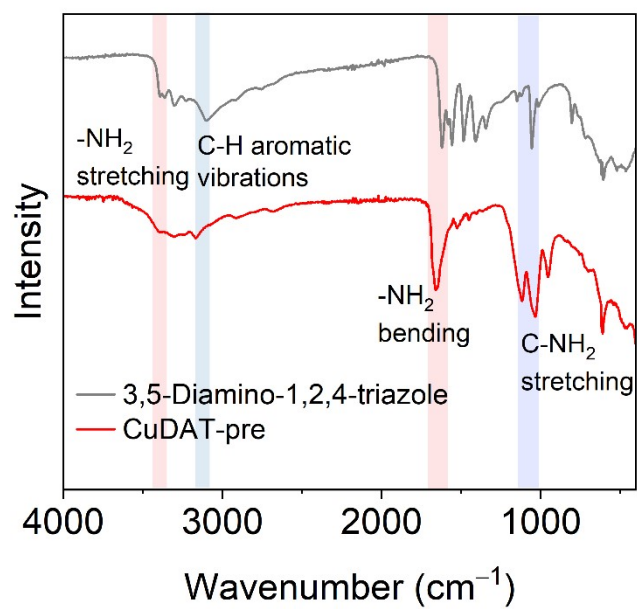

v

**Figure S6** ATR-FTIR spectrum of as-prepared CuDAT.

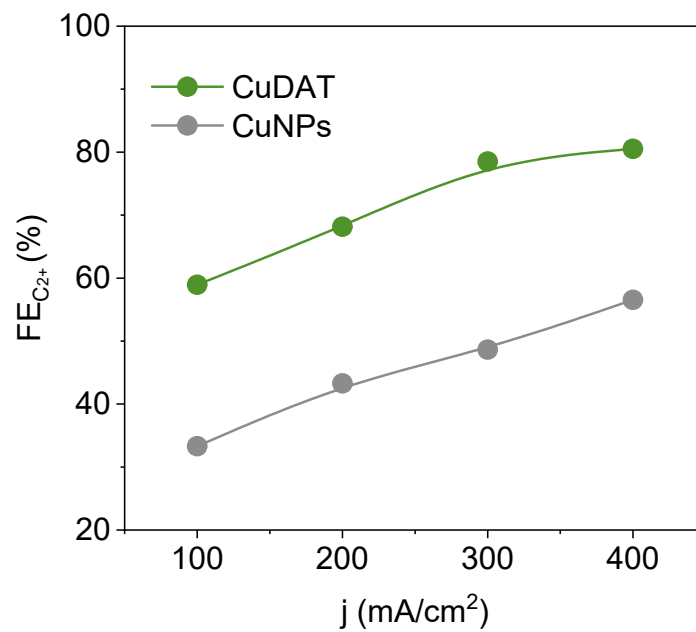

**Figure S7** FE(C<sub>2</sub><sup>+</sup>) comparison of CuDAT and CuNPs at different current density.

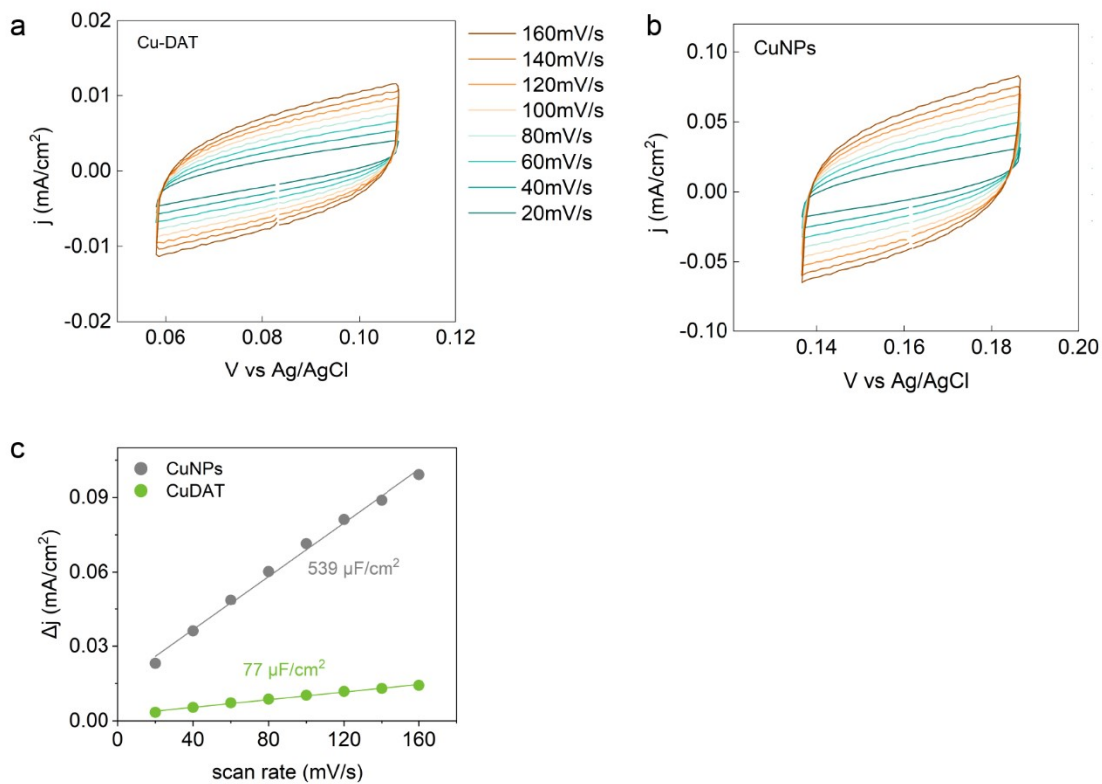

**Figure S8** The cyclic voltammety curve of (a) CuDAT, (b) CuNPs in Ar-saturated 1M KHCO<sub>3</sub>. (c) The fitted electrical double layer capacitance of CuDAT and CuNPs.

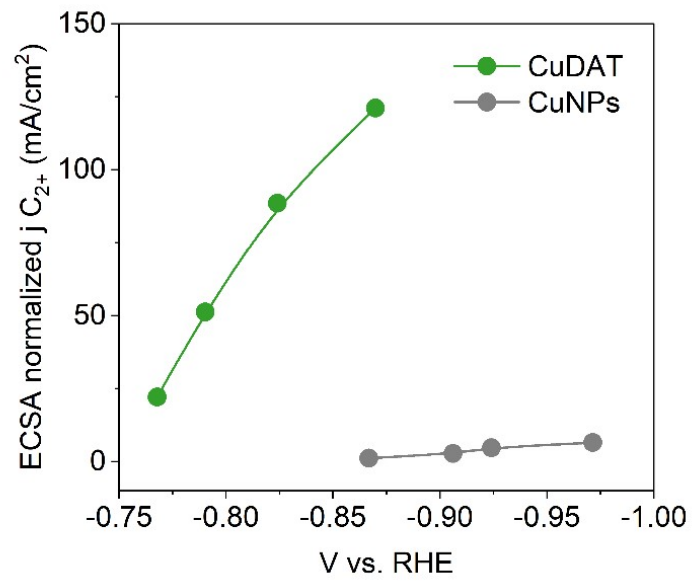

**Figure S9** ECSA normalized current density of CuDAT and CuNPs.

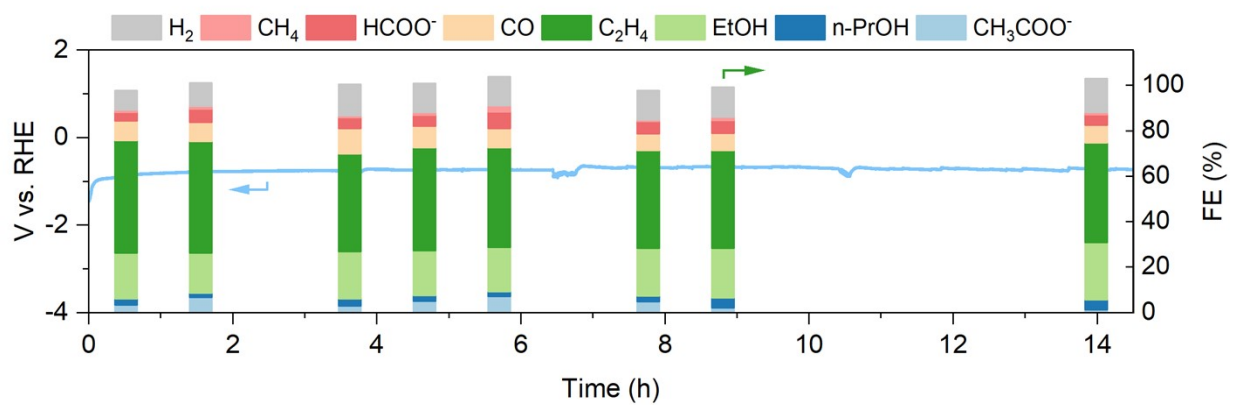

**Figure S10** CO<sub>2</sub>R stability test on CuDAT at 200 mA cm<sup>-2</sup>.

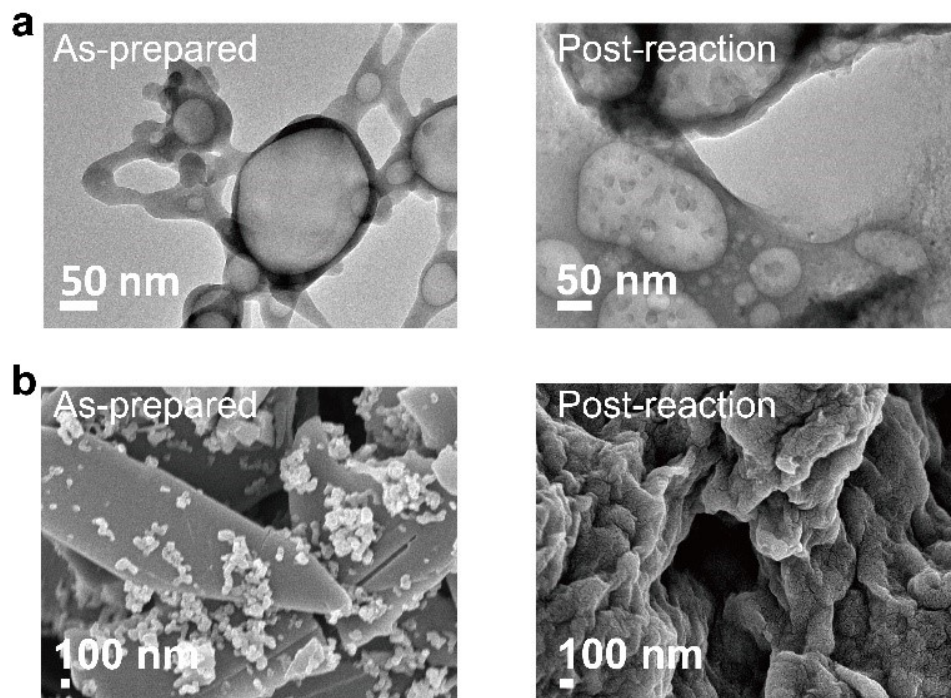

**Figure S11** (a) SEM and (b) TEM images of post-reaction CuDAT. (c) SEM images of as-prepared CuDAT.



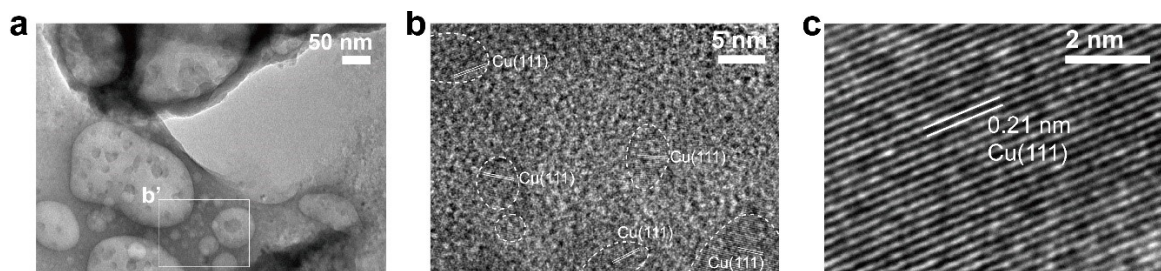

**Figure S12** (a) TEM image and (b, c) HRTEM images of post-reaction CuDAT samples. Zero-valence Cu aggregation happens with the particle size  $\sim 5$  nm.

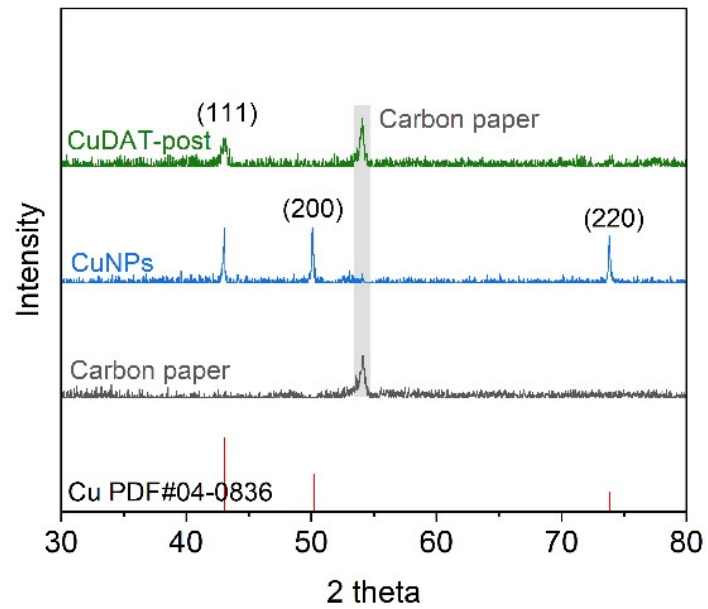

**Figure S13** XRD of post-reaction CuDAT, commercial CuNPs and carbon paper substrate.

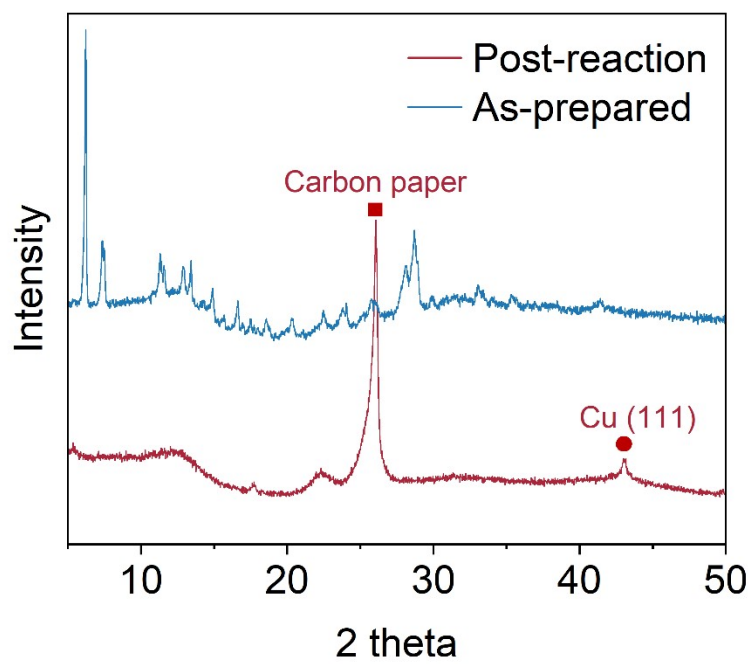

**Figure S14** XRD of as-prepared and post-reaction CuDAT.

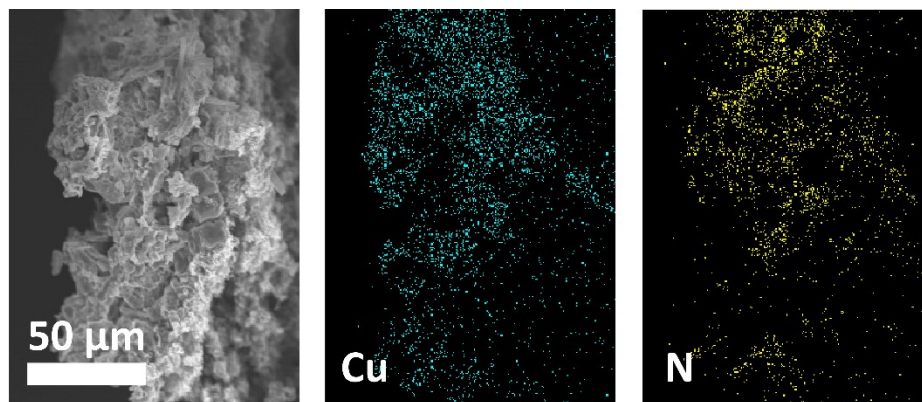

**Figure S15** Cross-section EDS mapping of post-reaction CuDAT.

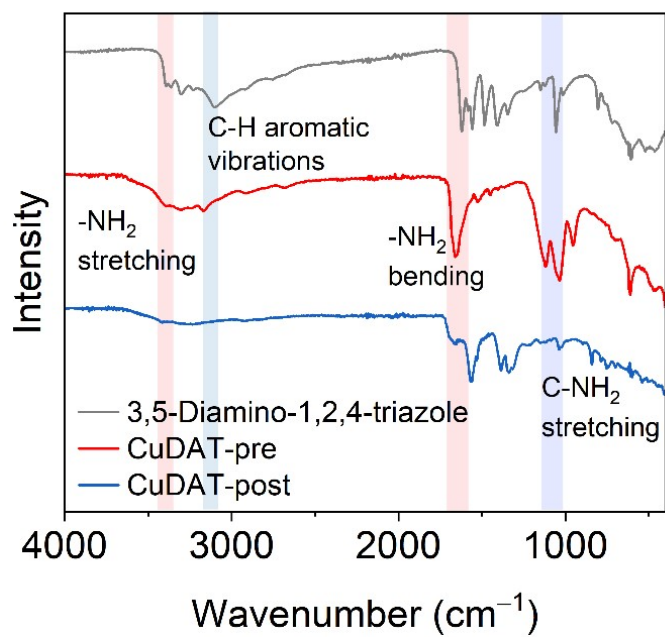

**Figure S16** ATR-FTIR spectra of post-reaction CuDAT.

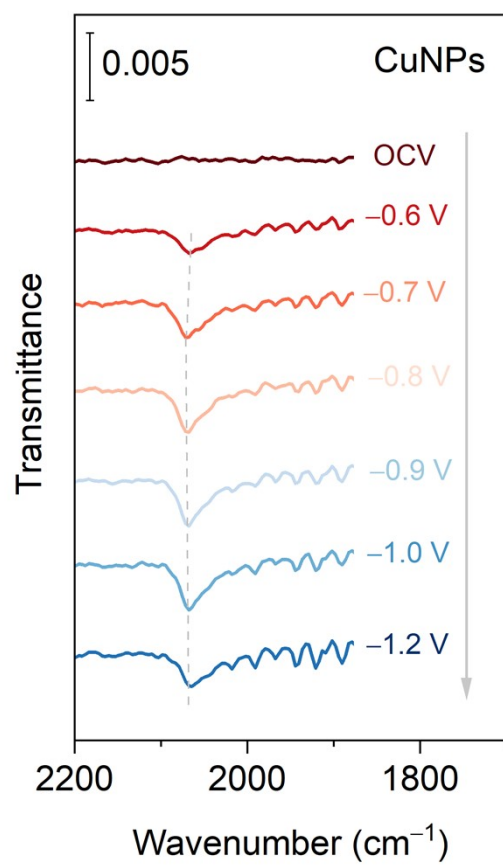

**Figure S17** *In situ*-ATR-SEIRAS spectra of commercial CuNPs.

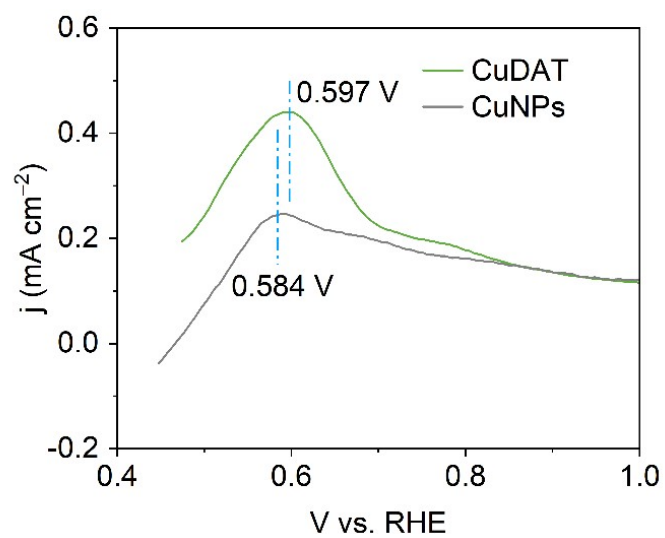

**Fig. S18** CO stripping on CuDAT and CuNPs with the scan rate of 10 mV S<sup>-1</sup>, after 10 s CO adsorption at -0.3 V in CO saturated 0.1 M KOH.

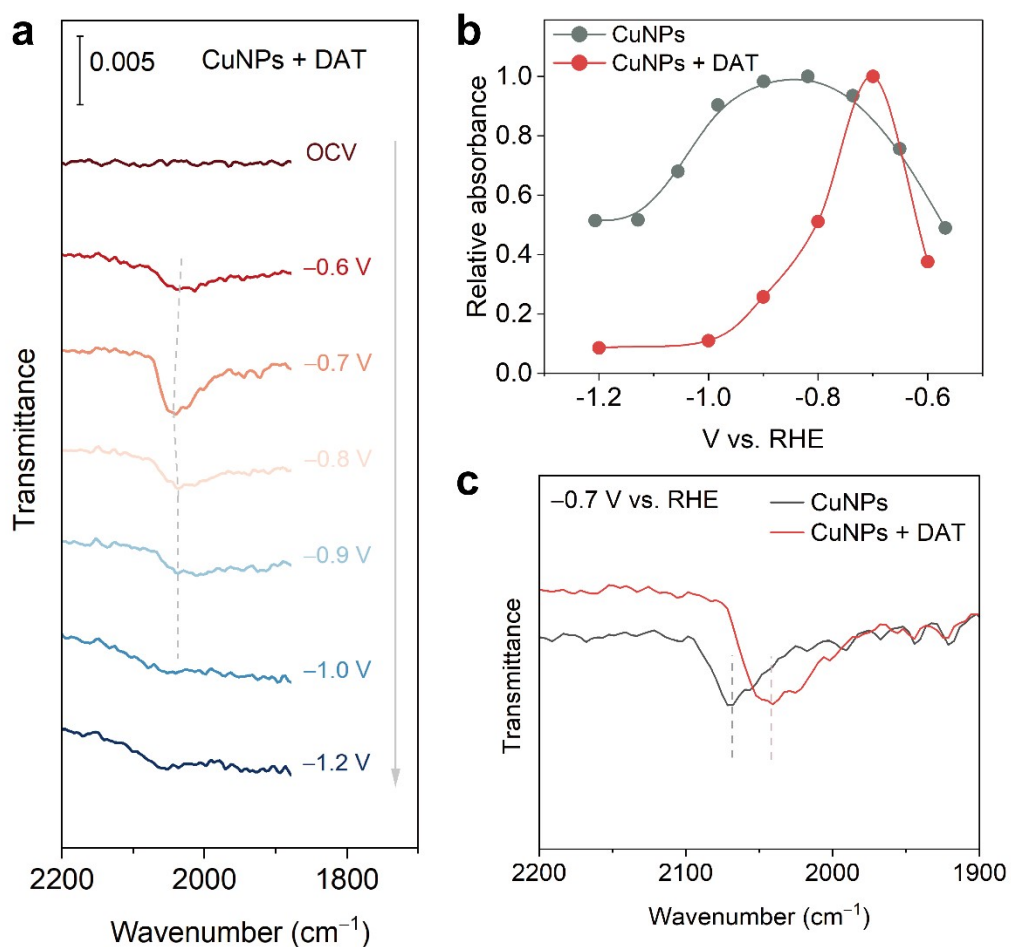

**Figure S19** (a) In-situ ATR-SEIRAS of physical mixture of commercial CuNPs and DAT ligand during CO<sub>2</sub>R (the mass ratio of DAT to CuNPs = 2). (b) Relative absorbance of \*CO<sub>L</sub> band for CuNPs, and physical mixture of CuNPs and DAT ligand. (c) \*CO<sub>L</sub> band in in-situ ATR-SEIRAS of CuNPs, and physical mixture of CuNPs and DAT ligand, at -0.7 V vs. RHE.



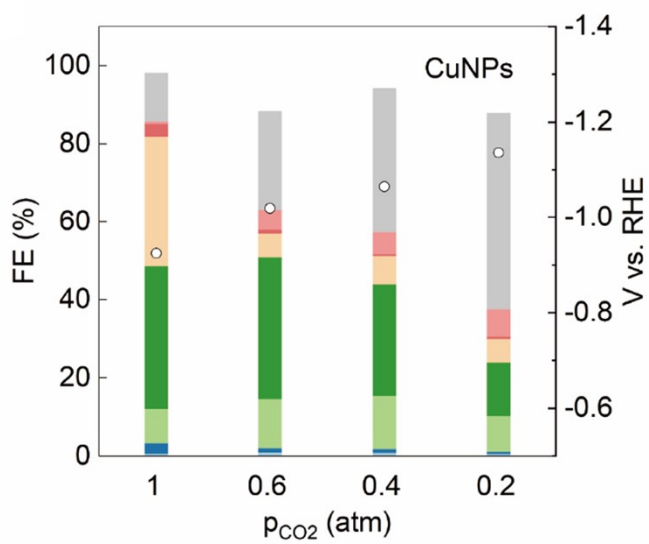

**Figure S20** Low-concentration CO<sub>2</sub> reduction performance of CuNPs in 1 M KHCO<sub>3</sub> at 300 mA cm<sup>-2</sup>.

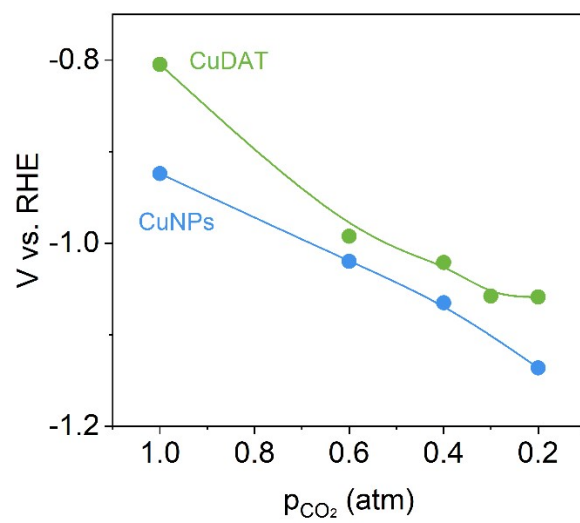

**Figure S21** Overpotential of CuDAT and CuNPs to achieve 300 mA cm<sup>-2</sup> at different CO<sub>2</sub> partial pressure.

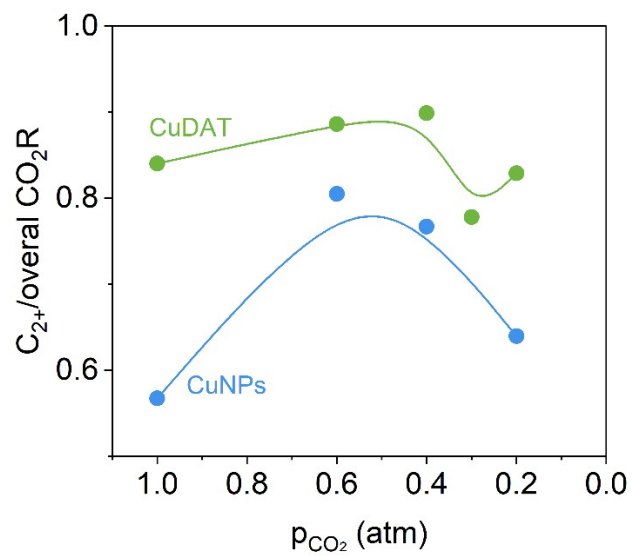

**Figure S22**  $\text{FE}(C_{2+})/\text{FE}(\text{CO}_2\text{R})$  for CuDAT and CuNPs with different  $p(\text{CO}_2)$  at  $300 \text{ mA cm}^{-2}$ .

## Reference

(1) Wang, L.; Nitopi, S.; Wong, A. B.; Snider, J. L.; Nielander, A. C.; Morales-Guio, C. G.; Orazov, M.; Higgins, D. C.; Hahn, C.; Jaramillo, T. F. Electrochemically converting carbon monoxide to liquid fuels by directing selectivity with electrode surface area. *Nat. Catal.* **2019**, *2*, 702-708.
